# Supplementary material
Source: PubMed Central journal article supplement (PMC4303452)
Supplement: embr0015-0086-sd2.pdf [file embr0015-0086-sd2.pdf]

Manuscript EMBOR-2013-37294

## **Cytosolic cleaved PINK1 represses Parkin translocation to mitochondria and mitophagy**

Maja A. Fedorowicz, Rosa de Vries-Schneider, Cornelia Rub, Dorothea Becker, Yong Huang, Chun Zhou, Dana M. Alessi Wolken, Wolfgang Voos, Yuhui Liu and Serge Przedborski

*Corresponding author: Serge Przedborski, Columbia University*

---

### **Review timeline:**

Submission date:

20 March 2013

Accepted:

04 November 2013

---

### **Transaction Report:**

No Peer Review Process File is available with this article, as the authors have chosen not to make the review process public in this case.
